# Supplementary material for: Cationic and oxygen defect modulation for tailoring the bandgap and room temperature ferromagnetism of CuO via multiple d-block cations
Source: Royal Society of Chemistry journal article supplement (doi:10.1039/d3ma00987d), 2024-01-01
Supplement: d3ma00987d1.pdf [file d3ma00987d1.pdf]

## Supporting Information

# Cationic and Oxygen Defects Modulation for Tailoring Bandgap and Room Temperature Ferromagnetism of CuO via Multiple d-Block Cations

Md Shafayatul Islam<sup>1</sup>, Koushik Roy Chowdhury<sup>1</sup>, Sheikh Manjura Hoque<sup>2</sup>, and Ahmed Sharif<sup>1\*</sup>

<sup>1</sup>Department of Materials and Metallurgical Engineering, Bangladesh University of Engineering and Technology, Dhaka 1000

<sup>2</sup>Materials Science Division, Atomic Energy Centre, Dhaka, Bangladesh

\*Email: [asharif@mme.buet.ac.bd](mailto:asharif@mme.buet.ac.bd)

### Defect Notation

Kröger-Vink notation is used to write simple equations to describe the formation of point defects and their interaction. The necessary explanation of the notation Summary for,  $S_P^c$ :

*S*: Species

*P*: Position in the crystal

*c*: Charge relative to the perfect crystal

Charge notation:

- Positive: point (\*)
- Negative: dash (')
- Neutral: *x*

## Structural Information

Table S1: Rietveld analysis of pristine CuO, CuO-a, CuO-b and CuO-c samples.

| Sample                     | CuO                       | CuO-a                     | CuO-b                     |              | CuO-c                     |              |
|----------------------------|---------------------------|---------------------------|---------------------------|--------------|---------------------------|--------------|
| Constituent phases         | CuO                       | CuO                       | CuO                       | Cu           | CuO                       | Cu           |
| Space group                | C2/c(15)                  | C2/c(15)                  | C2/c(15)                  | Fm-3m(225)   | C2/c(15)                  | Fm-3m(225)   |
| Unit cell parameter        | a = 4.6853 Å              | a = 4.6887 Å              | a = 4.6916 Å              | a = 3.6062 Å | a = 4.6887 Å              | a = 3.6195 Å |
|                            | b = 3.4240 Å              | b = 3.42 Å                | b = 3.4211 Å              |              | b = 3.4221 Å              |              |
|                            | c = 5.1317 Å              | c = 5.1295 Å              | c = 5.1326 Å              |              | c = 5.1292 Å              |              |
|                            | $\beta = 99.402^\circ$    | $\beta = 99.515^\circ$    | $\beta = 99.471^\circ$    |              | $\beta = 99.456^\circ$    |              |
|                            | V = 81.219 Å <sup>3</sup> | V = 81.121 Å <sup>3</sup> | V = 81.256 Å <sup>3</sup> |              | V = 46.898 Å <sup>3</sup> |              |
| Rietveld factors           | $R_{\text{exp}} = 5.845$  | $R_{\text{exp}} = 5.360$  | $R_{\text{exp}} = 7.011$  |              | $R_{\text{exp}} = 6.464$  |              |
|                            | $R_p = 6.19956$           | $R_p = 6.25719$           | $R_p = 6.6287$            |              | $R_p = 6.77898$           |              |
|                            | $R_{\text{wp}} = 8.92747$ | $R_{\text{wp}} = 8.34275$ | $R_{\text{wp}} = 8.91337$ |              | $R_{\text{wp}} = 9.00301$ |              |
|                            | GoF = 2.33                | GoF = 2.42                | GoF = 1.62                |              | GoF = 1.94                |              |
| Cu-O Bond length           | 1.95943 Å                 | 1.96091 Å                 | 1.96148 Å                 |              | 1.96018 Å                 |              |
| Average Cu-O-Cu Bond angle | 104.017°                  | 103.946°                  | 103.942°                  |              | 103.953°                  |              |

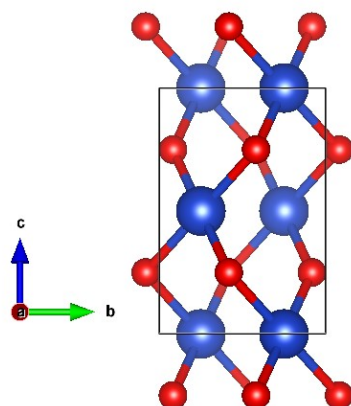

**Fig. S1 Monoclinic C2/c structure of CuO NCs.**

**XPS analysis**

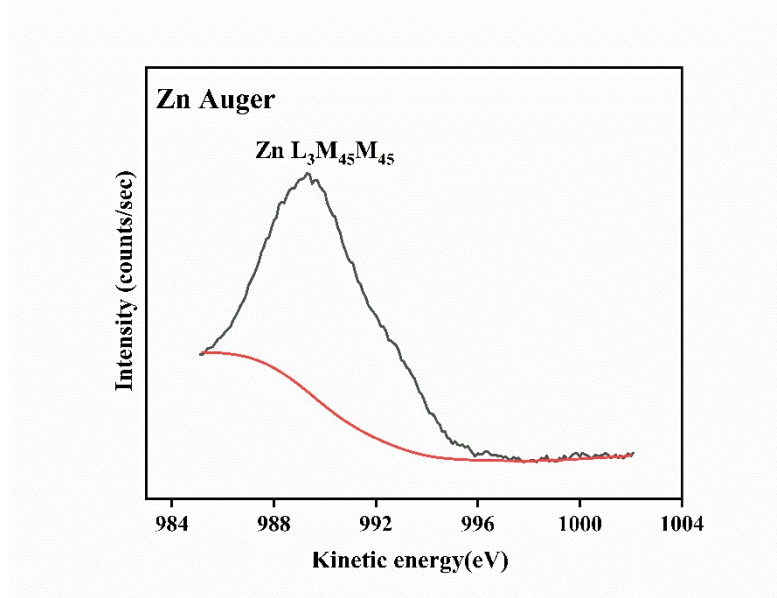

**Fig. S2 High-resolution spectrum of the Zn auger peak for CuO-c NCs.**

**Elemental analysis**

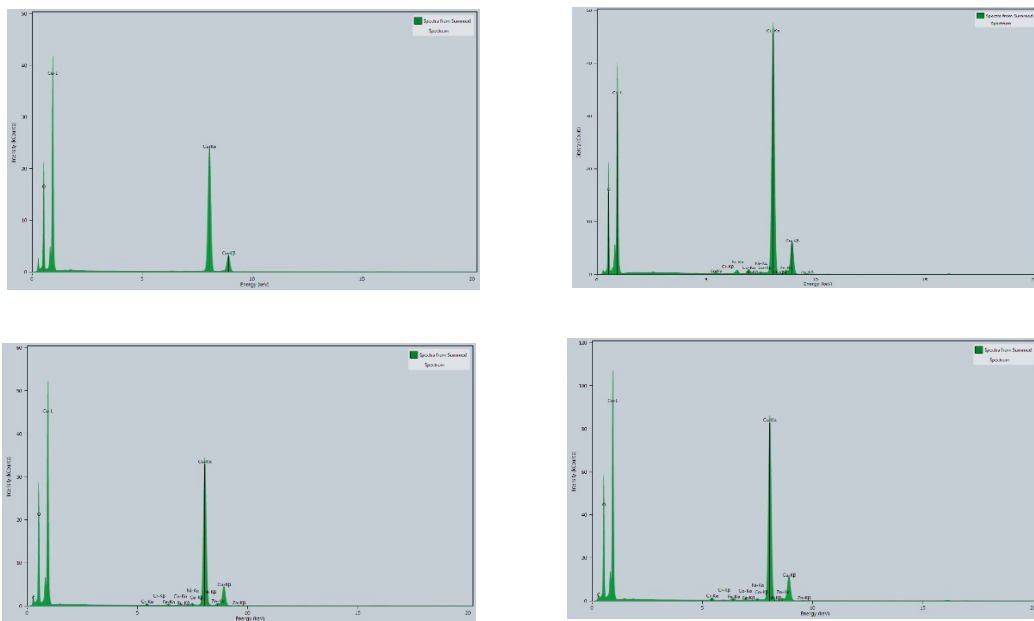

**Fig. S3 EDX Spectra of (a) Pristine CuO (b) CuO-a (c) CuO-b, and (d) CuO-c NCs.**

**Optical properties**

Using electronegativity, the geometric mean of the electronegativity of the component atoms, the edges of the conduction and valence bands of semiconductors were determined.

$$\chi = \sqrt[N]{\chi_1^a \chi_2^b \dots \chi_{n-1}^u \chi_n^v} \dots\dots\dots S1$$

Where N is the total number of elements in the compound,  $\chi_n$  is the electronegativity of specific element, and v is the mole fraction<sup>1</sup>. The electronegativity of a specific element is the mean of the ionization potential (IP) and atomic electron affinity (EA)<sup>2</sup>:

$$\chi_n = \frac{IP + EA}{2} \dots\dots\dots S2$$

Table S2: Calculated values of IP, EA, and electronegativity for Cu and O atoms.

| Elements | IP (eV) | EA (eV) | Electronegativity, $\chi_n$ (eV) |
|----------|---------|---------|----------------------------------|
| Cu       | 7.72    | 1.23    | 4.48                             |
| O        | 13.62   | 1.46    | 7.54                             |

Hence, the electronegativity of CuO NCs using equation S1:

$$\chi_{CuO} = \sqrt[2]{(4.48)_{Cu}^1 (7.54)_O^1} = 5.81$$

**Magnetic properties**

Magnetization (M) – Temperature (T) curves in zero field cooling (ZFC) mode were measured to further investigate the materials' magnetic characteristics at low temperatures (Fig. S4). ZFC magnetization is a metastable condition from a physical perspective, meaning that the relaxation time of the particle moment is often larger than the magnetic measurement time scale<sup>3</sup>. For ZFC mode, the sample was cooled from 400

K to 5 K in the absence of any fields. Magnetization was monitored as temperatures rose from 5 K by applying a small magnetic field of 100 Oe. ZFC curves display a peak-like feature (as shown by the orange arrow in Fig. S4) at around 200, 110.02, 40.1, and 110.02 K for pristine CuO, CuO-a, CuO-b, and CuO-c, respectively, after which the magnetic moments have gained enough thermal energy to flip randomly<sup>4</sup>.

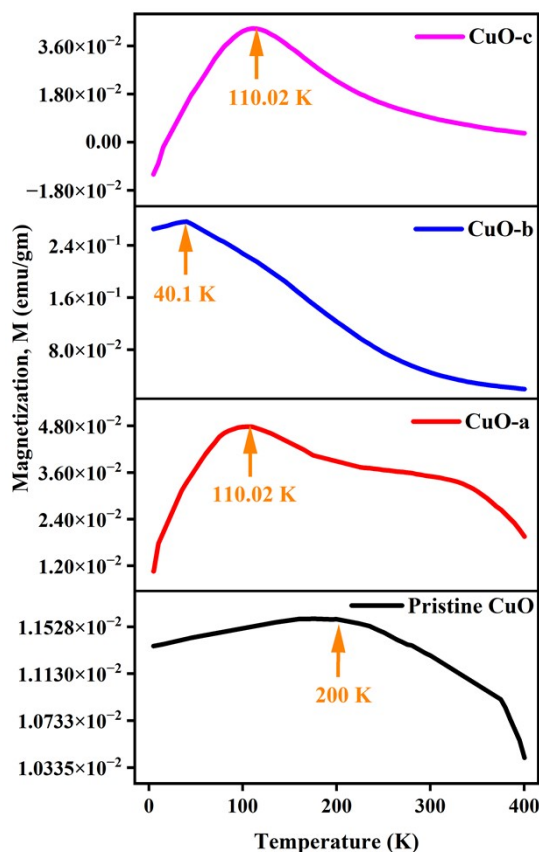

**Fig. S4 Thermomagnetization (M–T) curves in ZFC mode**

Thus, this peak temperature suggests an initiation of paramagnetism in the inner grains from the antiferromagnetic ordering of the bulk Cu-O-Cu chain<sup>5</sup>. With increasing particle size, the peak in ZFC becomes broader, which explains the broad nature of the pristine CuO peak noticed in ZFC curves<sup>6</sup>. A small amount of negative magnetization is observed at the low-temperature ZFC curve for CuO-c, which can be assigned to remnant magnetization present in the NCs that is not compensated by the 100 Oe field or the trapping of a small negative field in the NCs.

## References

- (1) Nethercot, A. H. Prediction of Fermi Energies and Photoelectric Thresholds Based on Electronegativity Concepts. *Phys. Rev. Lett.* **1974**, *33* (18), 1088–1091. <https://doi.org/10.1103/PhysRevLett.33.1088>.
- (2) Islam, Md. R.; Zubair, M. A.; Bashar, M. S.; Rashid, A. K. M. B. Bi<sub>0.9</sub>Ho<sub>0.1</sub>FeO<sub>3</sub>/TiO<sub>2</sub> Composite Thin Films: Synthesis and Study of Optical, Electrical and Magnetic Properties. *Sci Rep* **2019**, *9* (1), 5205. <https://doi.org/10.1038/s41598-019-41570-x>.
- (3) Paswan, S. K.; Kumari, S.; Kar, M.; Singh, A.; Pathak, H.; Borah, J. P.; Kumar, L. Optimization of Structure-Property Relationships in Nickel Ferrite Nanoparticles Annealed at Different Temperature. *Journal of Physics and Chemistry of Solids* **2021**, *151*, 109928. <https://doi.org/10.1016/j.jpcs.2020.109928>.
- (4) Punnoose, A.; Magnone, H.; Seehra, M. S.; Bonevich, J. Bulk to Nanoscale Magnetism and Exchange Bias in CuO Nanoparticles. *Phys. Rev. B* **2001**, *64* (17), 174420. <https://doi.org/10.1103/PhysRevB.64.174420>.
- (5) Manna, S.; De, S. K. Room Temperature Ferromagnetism in Fe Doped CuO Nanorods. *Journal of Magnetism and Magnetic Materials* **2010**, *322* (18), 2749–2753. <https://doi.org/10.1016/j.jmmm.2010.04.020>.
- (6) Ajroudi, L.; Mliki, N.; Bessais, L.; Madigou, V.; Villain, S.; Leroux, Ch. Magnetic, Electric and Thermal Properties of Cobalt Ferrite Nanoparticles. *Materials Research Bulletin* **2014**, *59*, 49–58. <https://doi.org/10.1016/j.materresbull.2014.06.029>.
